# Supplementary material for: Cell-Free DNA in Plasma and Serum Indicates Disease Severity and Prognosis in Blunt Trauma Patients
Source: MDPI journal article supplement (doi:10.3390/diagnostics13061150), 2023-03-17
Supplement: s1 [file s1]

## Supplementary Materials

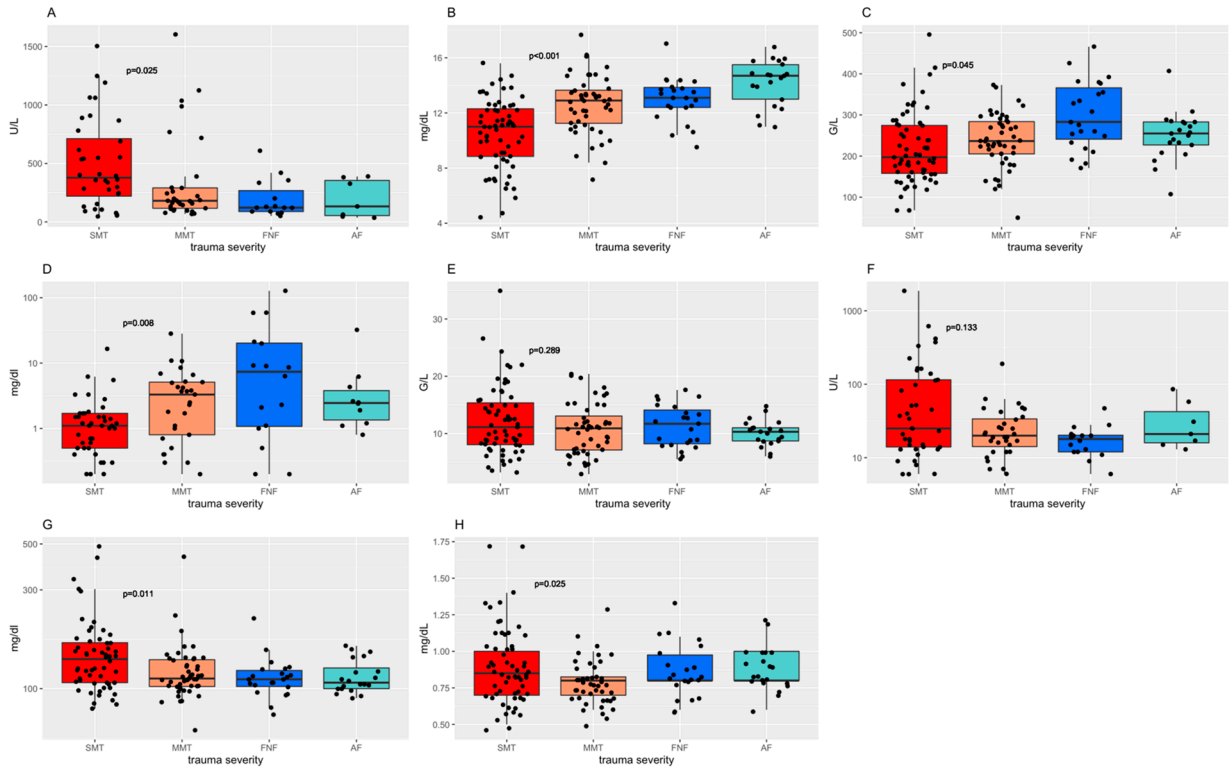

**Figure S1.** Boxplots of the distribution of investigated blood parameter levels. (A) creatinine kinase; (B) hemoglobin; (C) platelets; (D) c-reactive protein; (E) leukocytes; (F) alanine aminotransferase; (G) glucose; (H) creatinine. Values for D, F and G were logarithmized for illustration purposes. SMT (severe multiple trauma); MMT (moderate multiple trauma); FNF (femur neck fracture); AF (ankle fracture).

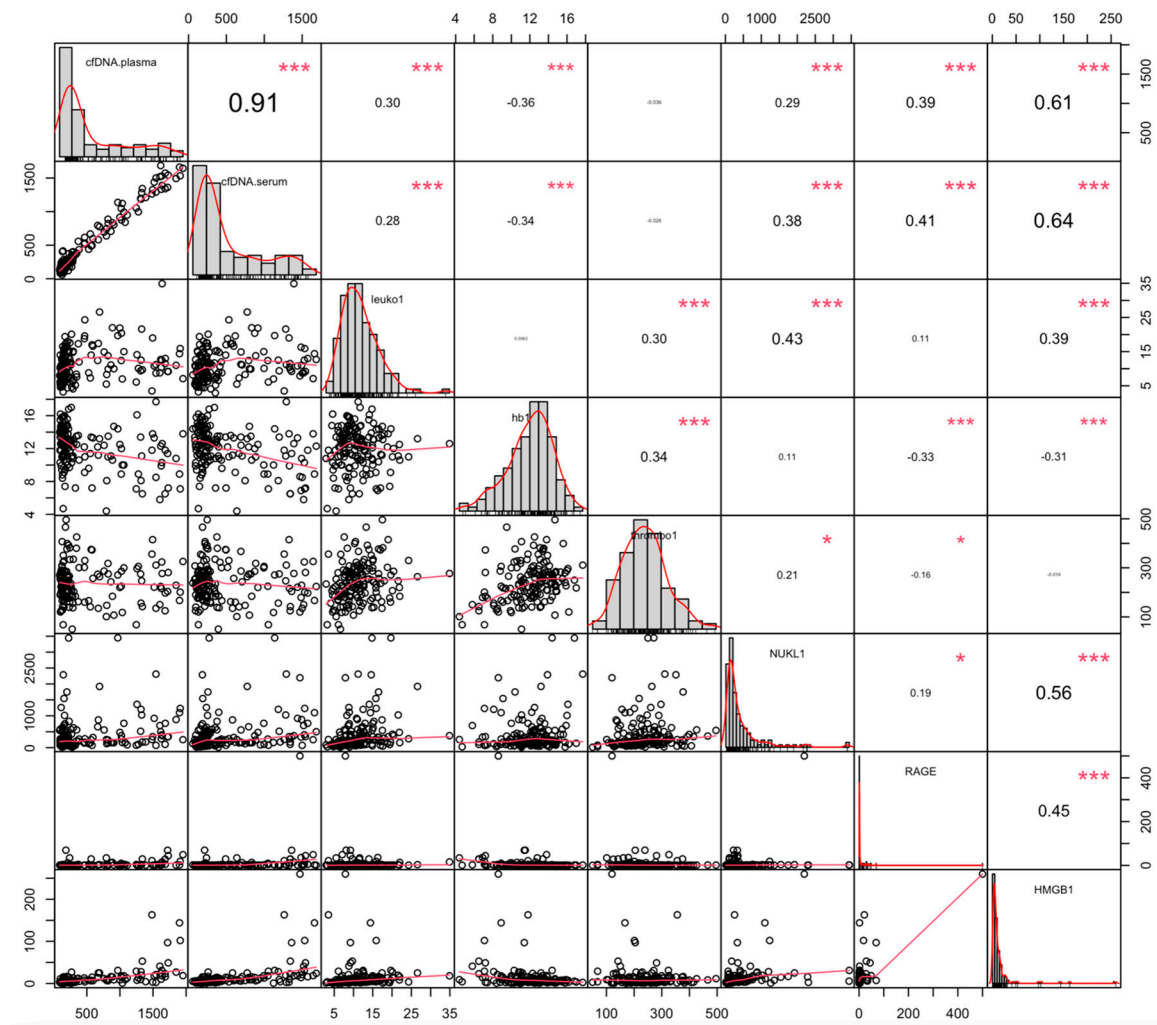

**Figure S2.** Correlation plots with R values for the additionally investigated blood parameters high-mobility group box 1 (HMGB1), soluble receptor for advanced glycation end products (sRAGE) and nucleosomes (NUKL1), cfDNA in serum and plasma and hematology parameters. Leukocytes (leuko1); hemoglobin (hb1); platelets (thrombo1). \* ( $p \leq 0.05$ ); \*\*\* ( $p \leq 0.001$ ).
